# Supplementary material for: PDF-1 neuropeptide signaling regulates sexually dimorphic gene expression in shared sensory neurons of C. elegans
Source: PubMed Central journal article supplement (PMC6053303; doi:10.7554/elife.36547), 2018-07-19
Supplement: elife-36547-supp1.pdf [file elife-36547-supp1.pdf]

**Supplementary File 1. *C. elegans* strains used in this study.**

| <b>STRAIN NAME</b> | <b>GENOTYPE</b>                                                                                              | <b>SOURCE</b>                  |
|--------------------|--------------------------------------------------------------------------------------------------------------|--------------------------------|
| CB1490             | <i>him-5(e1490)</i>                                                                                          | Caenorhabditis Genetics Center |
| ZD1005             | <i>ksIs2;him-5(e1490)</i>                                                                                    | Hilbert and Kim, 2017          |
| ZD1309             | <i>daf-7(ok3125); him-5(e1490)</i>                                                                           | Hilbert and Kim, 2017          |
| ZD1482             | <i>him-5(e1490); ofEx4</i>                                                                                   | Hilbert and Kim, 2017          |
| ZD1852             | <i>ksIs2; pdf-1(lst34); him-5(e1490)</i>                                                                     | This paper                     |
| ZD1962             | <i>ksIs2; pdf-1(tm1996); him-5(e1490)</i>                                                                    | This paper                     |
| ZD1987             | <i>ksIs2; pdf-1(ok3425); him-5(e1490)</i>                                                                    | This paper                     |
| ZD1997             | <i>ksIs2; him-5(e1490); pdf-2(tm4393)</i>                                                                    | This paper                     |
| ZD2033             | <i>him-5(e1490); qdEx149[pdf-1(+) + pofm-1::GFP]</i>                                                         | This paper                     |
| ZD2076             | <i>pdf-1(tm1996); him-5(e1490)</i>                                                                           | This paper                     |
| ZD2084             | <i>ksIs2; pdf-1(ok3425); him-5(e1490); qdEx150[trx-1p::pdf-1 cDNA (B isoform)::2A::mCherry +pofm-1::GFP]</i> | This paper                     |
| ZD2085             | <i>ksIs2; pdf-1(ok3425); him-5(e1490); qdEx151[wrm0629dH07(pdf-1 genomic) +pofm-1::GFP]</i>                  | This paper                     |
| ZD2094             | <i>pdf-1(ok3425); him-5(e1490)</i>                                                                           | This paper                     |
| ZD2106             | <i>pdf-1(ok3425); him-5(e1490); ofEx4</i>                                                                    | This paper                     |
| ZD2138             | <i>daf-7(ok3125); him-5(e1490); qdEx149</i>                                                                  | This paper                     |
| ZD2264             | <i>ksIs2; him-5(e1490); qdEx161[ptrx-1::acy-1(P260S)+pofm-1::gfp]</i>                                        | This paper                     |
| ZD2266             | <i>ksIs2; him-5(e1490); qdEx152[ptrx-1::acy-1(P260S)+pofm-1::gfp]</i>                                        | This paper                     |
| ZD2269             | <i>ksIs2; him-5(e1490); pdf-1(ok3425); qdEx152</i>                                                           | This paper                     |
| ZD2278             | <i>him-5(e1490); ofEx4; qdEx153[wrm0629dH07(pdf-1 genomic)+pofm-1::gfp]</i>                                  | This paper                     |
| ZD2281             | <i>ksIs2; pdf-1(ok3425); him-5(e1490); qdEx158[trx-1p::nCre+myo-2p::mCherry]</i>                             | This paper                     |
| ZD2282             | <i>ksIs2; pdf-1(ok3425); him-5(e1490); qdEx159[trx-1p::nCre+myo-2p::mCherry]</i>                             | This paper                     |
| ZD2290             | <i>ksIs2; pdf-1(ok3425); him-5(e1490); qdEx160[pSF11(tag-168p::Cre)+myo-2::mCherry]</i>                      | This paper                     |
| ZD2292             | <i>ksIs2; pdf-1(ok3425); him-5(e1490); qdEx157[pdf-1p(5 kb distal)::loxP::pdf-1B::loxP+ofm-1p::gfp]</i>      | This paper                     |
| ZD2340             | <i>pdf-1(tm1996); him-5(e1490); qdEx167[trx-1p::daf-7+ofm-1p::gfp]</i>                                       | This paper                     |
| ZD2355             | <i>ksIs2; him-5(e1490); qdEx165[trx-1p::pdf-1(SAS)+myo-2p::mCherry]</i>                                      | This paper                     |

|        |                                                                          |            |
|--------|--------------------------------------------------------------------------|------------|
| ZD2356 | <i>ksIs2; him-5(e1490); qdEx166[trx-1p::pdfr-1(SAS)+myo-2p::mCherry]</i> | This paper |
| ZD2360 | <i>ksIs2; him-5(e1490); qdEx163[trx-1p::gfp(SAS)+myo-2p::mCherry]</i>    | This paper |
| ZD2362 | <i>ksIs2; him-5(e1490); qdEx164[trx-1p::gfp(SAS)+myo-2p::mCherry]</i>    | This paper |
