# Supplementary material for: PDF-1 neuropeptide signaling regulates sexually dimorphic gene expression in shared sensory neurons of C. elegans
Source: PubMed Central journal article supplement (PMC6053303; doi:10.7554/elife.36547), 2018-07-19
Supplement: elife-36547-supp2.pdf [file elife-36547-supp2.pdf]

## Supplementary File 2. Oligos used for transgenic strain construction and *pdf-1* FISH

All sequences are listed in the 5' to 3' direction.

|                                                                            |                                             |
|----------------------------------------------------------------------------|---------------------------------------------|
| <b>Primers used to generate <i>pdf-1</i> overexpression construct</b>      |                                             |
| CTTGGCGTAATCATGGTCATAG                                                     | pUC19 forward                               |
| TTCACTGGCCGTCGTTTTACAAC                                                    | pUC19 reverse                               |
| gtaaacgacggccagtgaaAAAAGGTTGCTTTACCGAGAC                                   | pdf-1 genomic forward w/pUC19 overlap       |
| atgaccatgattacgccaagGCCACTTTTCACGCTTCAG                                    | pdf-1 genomic reverse w/pUC19 overlap       |
| <b>Primers used to generate ASJ-specific <i>pdf-1</i> rescue construct</b> |                                             |
| GTCCAATTACTCTTCAACATCC                                                     | pUC19+unc-54 3'UTR forward                  |
| TTCACTGGCCGTCGTTTTAC                                                       | pUC19+unc-54 3'UTR reverse                  |
| acgttgtaaacgacggccagtgaaTGAGTTGGCACTTCGTAG                                 | trx-1p forward w/ pUC19 overlap             |
| tgatagagtcagGATCAATTGCTCAAAGTCAC                                           | trx-1p reverse w/pdf-1 overlap              |
| tgagcaattgacCTGACTCATATCATGGCGG                                            | pdf-1 cDNA forward w/trx-1p overlap         |
| ttaaggctgcttgactggTGGAGATTTTGTGGAGCG                                       | pdf-1 cDNA reverse w/2A overlap             |
| accaccgtgtcaCCAGTCAAGCAGACCCTTAACTTC                                       | F2A::mCherry forward w/pdf-1 overlap        |
| taggatgttgaagagtaattggacCTTATACAATTCATCCATGCC                              | F2A::mCherry reverse w/unc-54 3'UTR overlap |
| <b>Primers used to generate ASJ-specific expression of ACY-1(P260S)</b>    |                                             |
| GTCCAATTACTCTTCAACATCC                                                     | trx-1p+unc-54 3'UTR backbone forward        |
| GATCAATTGCTCAAAGTCAC                                                       | trx-1p+unc-54 3'UTR backbone reverse        |
| gacttgagcaattgacATGGACGACGATGTCGGTG                                        | acy-1 forward w/ptrx-1 overlap              |
| gttgaagagtaattggacTTAAAATTCGTCTTCTTGGTTATCCTTG                             | acy-1 reverse w/unc-54 3'UTR overlap        |
| <b>Primers used to generate ASJ-specific RNAi constructs</b>               |                                             |
| acgttgtaaacgacggccagtgaaTGAGTTGGCACTTCGTAG                                 | trx-1p Forward w/pUC19 overlap              |
| tccagttccGATCAATTGCTCAAAGTCAC                                              | trx-1p Reverse w/pdf-1 sense overlap        |
| tgtgtcaacaGATCAATTGCTCAAAGTCAC                                             | trx-1p Reverse w/pdf-1 anti-sense overlap   |
| tccactgacaGATCAATTGCTCAAAGTCAC                                             | trx-1p Reverse w/gfp sense overlap          |
| ctgtgetcccGATCAATTGCTCAAAGTCAC                                             | trx-1p Reverse w/gfp anti-sense overlap     |

|                                                                                                            |                                                                      |
|------------------------------------------------------------------------------------------------------------|----------------------------------------------------------------------|
| gcaattgacGGAAACTGGAATTCGTGG                                                                                | pdfr-1 sense Forward w/trx-1 overlap                                 |
| atgacatgattacgccaagTGTTGACACATCCTGCTG                                                                      | pdfr-1 sense reverse w/pUC19 overlap                                 |
| gcaattgacTGTTGACACATCCTGCTG                                                                                | pdfr-1 antisense Forward w/trx-1 overlap                             |
| atgacatgattacgccaagGGAAACTGGAATTCGTGG                                                                      | pdfr-1 antisense Reverse w/pUC19 overlap                             |
| gcaattgacTGTCAGTGGAGAGGGTGAAG                                                                              | gfp sense Forward w/trx-1 overlap                                    |
| atgacatgattacgccaagGGGAGCACAGGGAGAAAG                                                                      | gfp sense Reverse w/pUC19 overlap                                    |
| gcaattgacGGGAGCACAGGGAGAAAG                                                                                | gfp antisense Forward w/trx-1 overlap                                |
| atgacatgattacgccaagTGTCAGTGGAGAGGGTGAAG                                                                    | gfp antisense Reverse w/pUC19 overlap                                |
| tgagttggcacttcgtaga                                                                                        | nested trx-1p Forward                                                |
| TGCAAATTCTTACCACTGCATCT                                                                                    | nested pdfr-1 sense R                                                |
| aaactatgactcggcgcaac                                                                                       | nested pdfr-1 antisense R                                            |
| TTAGAAGTCAGAGGCACGGG                                                                                       | nested gfp sense R                                                   |
| TGCACTACTGGAAAACCTG                                                                                        | nested gfp antisense R                                               |
| *pUC19 backbone was amplified with primers listed above and used for all Gibson cloning of RNAi constructs |                                                                      |
|                                                                                                            |                                                                      |
| <b>Primers used to generate floxed <i>pdfr-1</i> rescue construct and ASJ-specific Cre</b>                 |                                                                      |
| GGCGCGCCTCTAGAGGATC                                                                                        | pSF11 forward for amplifying Cre in plasmid backbone w/out promoter  |
| GGCCGGCCCAGTCAGTGC                                                                                         | pSF11 reverse for amplifying Cre in plasmid backbone w/out promoter  |
| ccgcactgactggccgccTGAGTTGGCACTTCGTAG                                                                       | trx-1p forward w/pSF11 overlap                                       |
| ggatccttagaggcgccGATCAATTGCTCAAAGTCAC                                                                      | trx-1p reverse w/Cre overlap                                         |
| ataactcgtatagcatacattatacgaagttatGTCCAATTACTCTTCAACA TCCC                                                  | pPD95.75 Forward w/loxP overlap                                      |
| GTCGACCTGCAGGCATGC                                                                                         | pPD95.75 reverse primer                                              |
| taagcttgcagcctgcaggtgcacAAAAGGTTAAGCGCCCTTG                                                                | pdfr-1p(5kb) Forward w/pPD95.75 overlap                              |
| gtatgctatacgaagttatTTCAATTGACGTTTGACC                                                                      | pdfr-1p(5kb) Reverse w/loxP overlap                                  |
| agaattggtcaaacgtcgaattgaataactcgtatagcatacattatacgaagttatCTG ACTCATATCATGGCG                               | pdfr-1 cDNA Forward w/loxP site and pdfr-1p(5kb) overlap             |
| tagggatgtgaagagtaattggacataactcgtataatgtatgctatacgaagttatTTAT GGAGATTTTGTGGAGC                             | pdfr-1 cDNA Reverse with loxP site and pPD95.75/unc-54 3'UTR overlap |

|                                     |  |
|-------------------------------------|--|
|                                     |  |
| <b><i>pdfr-1</i> FISH Probe Set</b> |  |
| accataagcattgcaatcat                |  |
| caatatagagtagcagccga                |  |
| ccatttcaccagtgaatat                 |  |
| ttctgctgagttcgtgtgag                |  |
| ggcatagtattatcgtttt                 |  |
| gaacattccttcacaacga                 |  |
| attccttctaagaacatcca                |  |
| agggtaacaattttggctcc                |  |
| ataccgtatccagcaatgaa                |  |
| tagccagagcattgtgtgaa                |  |
| ctttttgatgagcaccaca                 |  |
| taagcatcgttccacttga                 |  |
| ctaggaccatctagaatcca                |  |
| attatcacaagtctgcca                  |  |
| gactcgaatgacattacag                 |  |
| agattctcgaactttactgt                |  |
| agacctgcttcagacgtatt                |  |
| attgcagctttgaccgattt                |  |
| acctaacagcggcaataaca                |  |
| ttgtttgcattatattcgga                |  |
| ttatccctagttggtgcaaa                |  |
| cgccaacagcaaatacca                  |  |
| tataggtgaaagagcggtg                 |  |
| atactggcaaccataagtcc                |  |
| aacctcctgttcgtaaagc                 |  |
| agaaggtcttgaggacgtga                |  |
| ttatggaggagtcgataaccg               |  |
| tcgtcgaagttcgttttgtg                |  |
| ataatgggatgacgacgcttc               |  |
| ttagctgtccatttttgc                  |  |
| tatttgtctgtggtgcaactt               |  |
| agttttccaaactcgtcagc                |  |
| ttttactccttgacgggaac                |  |
| cgtcgtggaatcatcgtac                 |  |
| catcactgcactttcatca                 |  |
| tgtttgcattctttctct                  |  |
